# Supplementary material
Source: PubMed Central journal article supplement (PMC8362029)
Supplement: HUMU-42-877-s001.pdf [file HUMU-42-877-s001.pdf]

**Supplemental Table 1. Predicted miRNA target effects for c.\*529A>G variant.**

| Variant         | miRNA           | Database               | Conservation Score | Functional Effect | Context Score Change |
|-----------------|-----------------|------------------------|--------------------|-------------------|----------------------|
| c.*529A>G       | hsa-miR-1231    | PolymiRTS Database 3.0 | 10                 | D                 | -0.246               |
|                 |                 | MicroSNiPer            | N/A                | D                 | N/A                  |
|                 | hsa-miR-1299    | PolymiRTS Database 3.0 | 11                 | D                 | -0.093               |
|                 |                 | MicroSNiPer            | N/A                | D                 | N/A                  |
|                 | hsa-miR-6128    | PolymiRTS Database 3.0 | 11                 | D                 | -0.077               |
|                 | hsa-miR-654-3p  | PolymiRTS Database 3.0 | 12                 | D                 | -0.137`              |
|                 |                 | MicroSNiPer            | N/A                | D                 | N/A                  |
|                 | hsa-miR-875-3p  | PolymiRTS Database 3.0 | 11                 | D                 | -0.071               |
|                 |                 | MicroSNiPer            | N/A                | C                 | N/A                  |
|                 | hsa-miR-3681-5p | MicroSNiPer            | N/A                | U                 | N/A                  |
|                 | hsa-miR-1254    | PolymiRTS Database 3.0 | 10                 | C                 | -0.392               |
|                 |                 | MicroSNiPer            | N/A                | C                 | N/A                  |
|                 | hsa-miR-3116    | PolymiRTS Database 3.0 | 10                 | C                 | -0.413               |
|                 |                 | MicroSNiPer            | N/A                | C                 | N/A                  |
|                 | hsa-miR-661     | PolymiRTS Database 3.0 | 10                 | C                 | -0.15                |
|                 |                 | MicroSNiPer            | N/A                | C                 | N/A                  |
| hsa-miR-4633-5p | MicroSNiPer     | N/A                    | C                  | N/A               |                      |
| hsa-miR-4254    | MicroSNiPer     | N/A                    | C                  | N/A               |                      |

D: variant disrupts the predicted miRNA site; C: variant creates a predicted miRNA site; U: unaffected.

**Supplemental Table 2. Predicted RNA binding protein (RBP) effects with non-coding variation.**

| Untranslated Region | Variant   | RNA-Binding Protein | Motif   | Functional Effect | Z-score | P-value  |
|---------------------|-----------|---------------------|---------|-------------------|---------|----------|
| 5' UTR              | WT        | SRSF3               | cuckucy | D                 | 1.670   | 4.75e-02 |
|                     | c.-68T>C  |                     |         |                   | N/A     | N/A      |
|                     | WT        | RBM6                | haucrar | C                 | N/A     | N/A      |
|                     | c.-68T>C  |                     |         |                   | 2.775   | 2.76e-03 |
| 3' UTR              | WT        | HNRNPL              | amayama | D                 | 2.387   | 8.49e-03 |
|                     | c.*529A>G |                     |         |                   | N/A     | N/A      |
|                     | WT        | HNRPLL              | rcahaca | U                 | 2.519   | 5.88e-03 |
|                     | c.*529A>G |                     |         |                   | 2.025   | 2.14e-02 |
|                     | WT        | IGF2BP2             | vmahwca | D                 | 1.986   | 2.35e-02 |
|                     | c.*529A>G |                     |         |                   | N/A     | N/A      |
|                     | WT        | RBM41               | wuacwuk | D                 | 2.420   | 7.76e-03 |
|                     | c.*529A>G |                     |         |                   | N/A     | N/A      |
|                     | WT        | SRSF3               | wcwwc   | D                 | 2.402   | 8.15e-03 |
|                     | c.*529A>G |                     |         |                   | N/A     | N/A      |
|                     | WT        | SRSF5               | yywcwsg | C                 | N/A     | N/A      |
|                     | c.*529A>G |                     |         |                   | 2.204   | 1.38e-02 |

D: variant disrupts the predicted RBP motif site; C: variant creates a predicted RBP motif; U: unaffected.

Z-score and P-value reflect the reliability of the predicted binding site

Supp. Figure 1. *In silico* protein modeling.

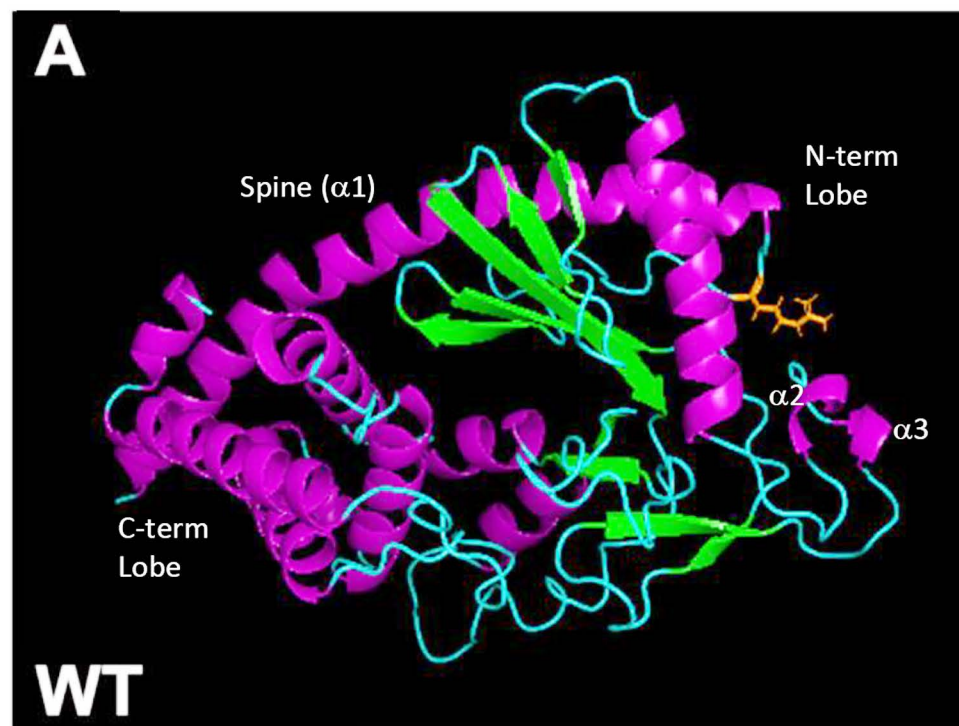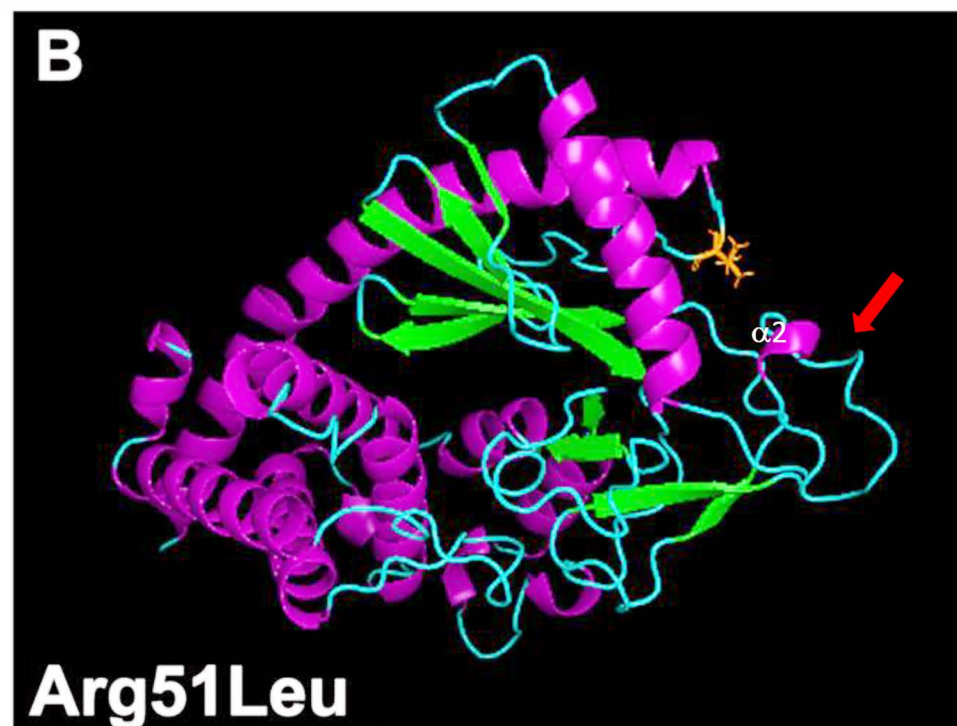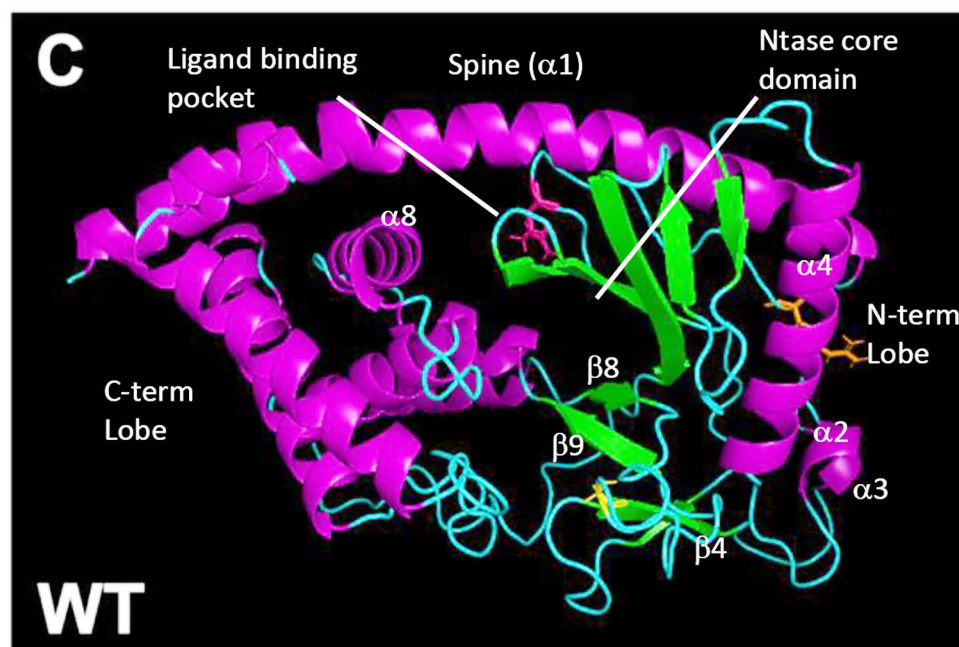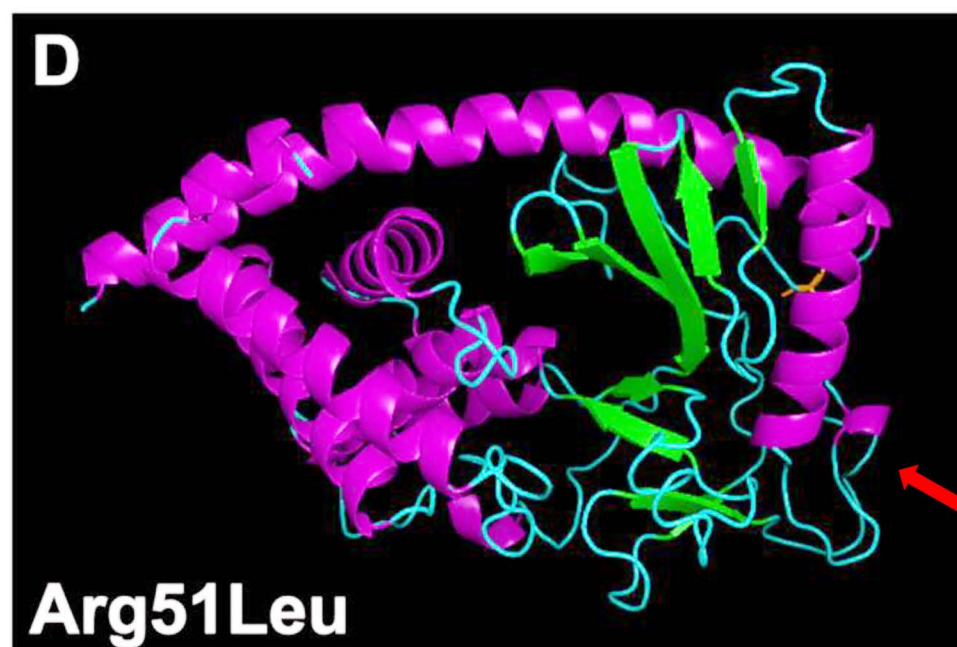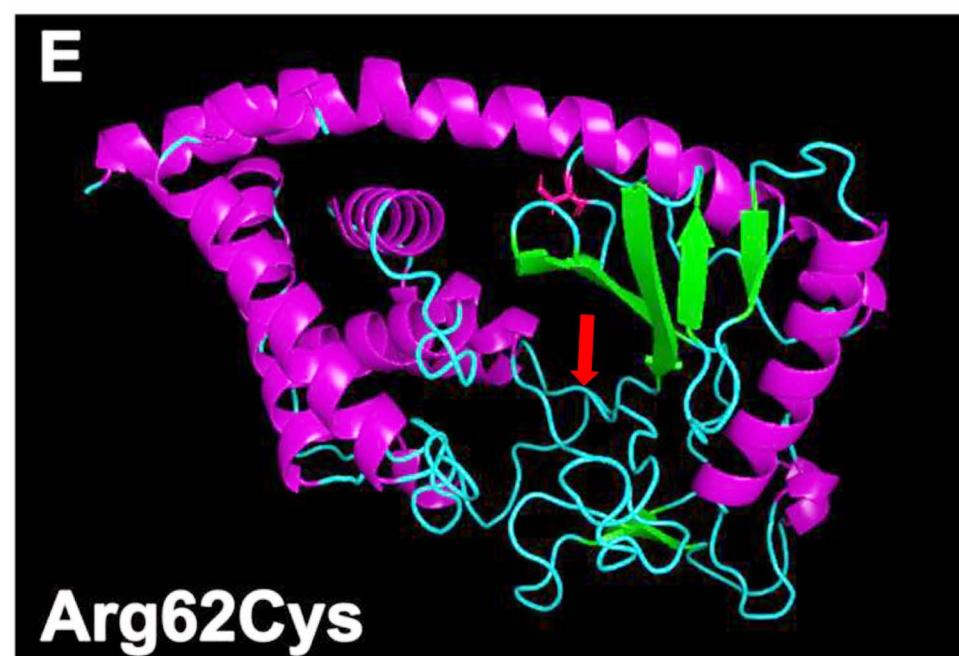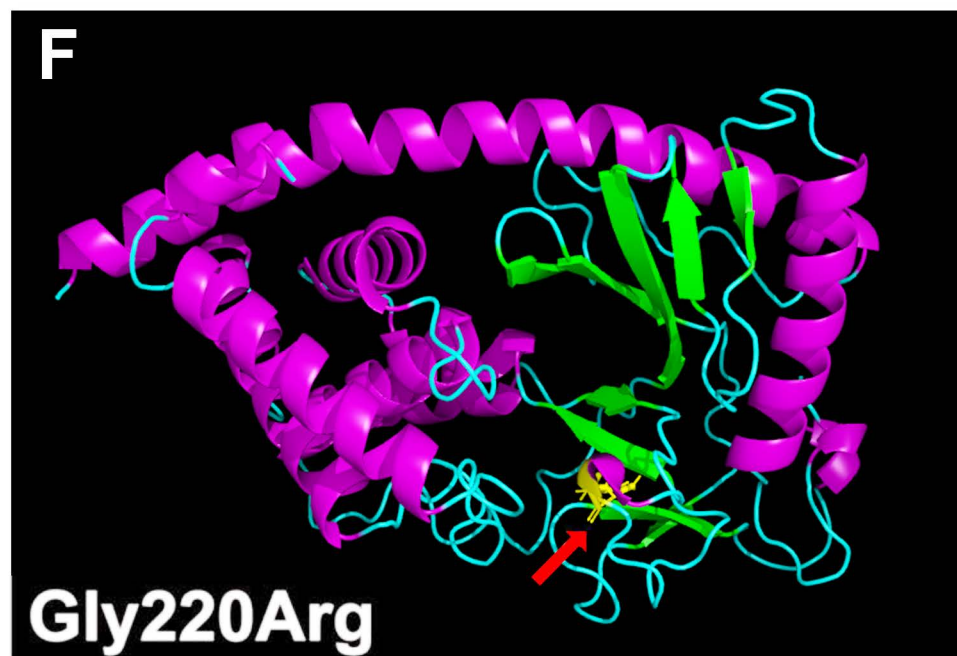

**Supp. Figure 1. *In silico* protein modeling.** Protein structures for the solved MAB21L1 wild-type (5EOG) (de Oliveira Mann et al., 2016) (**A,C**) and the I-TASSER predicted mutants (Arg51Leu **B,D**; Arg62Cys **E**; Gly220Arg **F**). Amino acids (aa) of interest are highlighted as follows: aa51 orange, aa62pink, aa220 yellow. Alpha helices are purple, beta sheets green, linker regions blue. Red arrows (**B,D,E,F**) indicate observed structural changes upon mutation.

Supp. Figure 2. Multi-species sequence comparisons of *MAB21L1* non-coding regions.

A

5' UTR sequence; 13:36050329 – 36050370 (forward sequence)

|                          |                                            |
|--------------------------|--------------------------------------------|
| Human                    | tttctccaccgaagtggctccagctcttagcagccgcatgg  |
| Individual 2             | tttctccaccgaagtggctccagctcttagcagccgcatgg  |
| Chimp                    | tttctccaccgaagtggctccagctcttagcagccgcatgg  |
| Gorilla                  | tttctccaccgaagtggctccagctcttagcagccgcatgg  |
| Orangutan                | tttctccaccgaagtggctccagctcttagcagccgcatgg  |
| Gibbon                   | tttctccaccgaagtggctccagctcttagcagccgcatgg  |
| Baboon                   | tttctccaccgaagtggctccagctcttagcagccgcatgg  |
| Green monkey             | tttctccaccgaagtggctccagctcttagcagccgcatgg  |
| Marmoset                 | tttctccaccgaagtggctccagctcttagcagccgcatgg  |
| Squirrel monkey          | tttctccaccgaagtggctccagctcttagcagccgcatgg  |
| Chinese tree shrew       | tttctccaccgaagtggctccagctcttagcagccgcatgg  |
| Squirrel                 | tttctccaccgaagtggctccagctcttagcagccgcatgg  |
| Lesser Egyptian jerboa   | ggttctctccgaagtggctcccgcgcagcagccgcatgg    |
| Prairie vole             | tttctccaccgaagtggctccagctcttagcagccgcatgg  |
| Chinese hamster          | tttctccaccgaagtggctccagctcttagcagccgcatgg  |
| Golden hamster           | tttctccaccgaagtggctccagctcttagcagccgcatgg  |
| Mouse                    | tttctccaccgaagtggctccagctcttagcagccgcatgg  |
| Rat                      | tttctccaccgaagtggctccagctcttagcagccgcatgg  |
| Naked mole-rat           | tttctccaccgaagtggctccagctcttagcagccgcatgg  |
| Guinea pig               | tttctccaccgaagtggctccagctcttagcagccgcatgg  |
| Chinchilla               | tttctccaccgaagtggctccagctcttagcagccgcatgg  |
| Brush-tailed rat         | attctccaccgaagtggctccagctcttagcagccgcatgg  |
| Rabbit                   | tttctccaccgaagtggctccagctcttagcagccgcatgg  |
| Pika                     | tttctccaccgaagtggctccagctcttagcagccgcatgg  |
| Pig                      | tttctccaccgaagtggctccagctcttagcagccgcatgg  |
| Alpaca                   | tttctccaccgaagtggctccagctcttagcagccgcatgg  |
| Bactrian camel           | tttctccaccgaagtggctccagctcttagcagccgcatgg  |
| Killer whale             | tttctccaccgaagtggctccagctcttagcagccgcatgg  |
| Tibetan antelope         | tttctccaccgaagtggctccagctcttagcagccgcatgg  |
| Cow                      | tttctccaccgaagtggctccagctcttagcagccgcatgg  |
| Sheep                    | tttctccaccgaagtggctccagctcttagcagccgcatgg  |
| Domestic goat            | tttctccaccgaagtggctccagctcttagcagccgcatgg  |
| Horse                    | tttctccaccgaagtggctccagctcttagcagccgcatgg  |
| White rhinoceros         | tttctccaccgaagtggctccagctcttagcagccgcatgg  |
| Cat                      | tttctccaccgaagtggctcccgccttagcagccgcatgg   |
| Ferret                   | tttctccaccgaagtggctcccgccttagcagccgcatgg   |
| Panda                    | tttctccaccgaagtggctcccgccttagcagccgcatgg   |
| Pacific walrus           | tttctccaccgaagtggctcccgccttagcagccgcatgg   |
| Weddell seal             | tttctccaccgaagtggctcccgccttagcagccgcatgg   |
| Megabat                  | tttctgcaac-gaagtggctccagcccagcagccgcatgg   |
| David's myotis (bat)     | tttctgccc-gaagtggctccagctcttagcagccgcatgg  |
| Microbat                 | tttctgcaac-gaagtggctcccgccttagcagccgcatgg  |
| Big brown bat            | tttctgcaac-gaagtggctcccgccttagcagccgcatgg  |
| Hedgehog                 | tttctccaccgaagtggctcccgccttagcagccgcatgg   |
| Shrew                    | tttctccaccgaagtggctcccgccttagcagccgcatgg   |
| Star-nosed mole          | tttctccaccgaagtggctcccgccttagcagccgcatgg   |
| Cape elephant shrew      | tttctccaccgaagtggctcccgccttagcagccgcatgg   |
| Manatee                  | tttctccaccgaagtggctcccgccttagcagccgcatgg   |
| Cape golden mole         | tttctccaccgaagtggctcccgccttagcagccgcatgg   |
| Tenrec                   | gtcctcctccgaagtggctcccgccttagcagccgcatgg   |
| Aardvark                 | attctgcccgaagtggctcccgccttagcagccgcatgg    |
| Armadillo                | cccggcaccgcccgtggctcccgccttagcagccgcatgg   |
| Opossum                  | tttctcctctgaagtggctcccgccttagcagccgcatgg   |
| Tasmanian devil          | tttctcctctgaagtggctcccgccttagcagccgcatgg   |
| Wallaby                  | tttctcctctgaagtggctcccgccttagcagccgcatgg   |
| Platypus                 | tttctcctctgaagtggctcccgccttagcagccgcatgg   |
| Saker falcon             | tttctcctctgaagtggctcccgccttagcagccgcatgg   |
| Peregrine falcon         | tttctcctctgaagtggctcccgccttagcagccgcatgg   |
| Collared flycatcher      | tttctcctctgaagtggctcccgccttagcagccgcatgg   |
| White-throated sparrow   | tttctcctctgaagtggctcccgccttagcagccgcatgg   |
| Medium ground finch      | tttctcctctgaagtggctcccgccttagcagccgcatgg   |
| Zebra finch              | tttctcctctgaagtggctcccgccttagcagccgcatgg   |
| Tibetan ground jay       | tttctcctctgaagtggctcccgccttagcagccgcatgg   |
| Budgerigar               | tttctcctctgaagtggctcccgccttagcagccgcatgg   |
| Parrot                   | tttctcctctgaagtggctcccgccttagcagccgcatgg   |
| Scarlet macaw            | tttctcctctgaagtggctcccgccttagcagccgcatgg   |
| Rock pigeon              | tttctcctctgaagtggctcccgccttagcagccgcatgg   |
| Mallard duck             | tttctcctctgaagtggctcccgccttagcagccgcatgg   |
| Chicken                  | attctccc-gaagtggctcccgccttagcagccgcatgg    |
| American alligator       | tttctcccctgaagtggctcccgccttagcagccgcatgg   |
| Green sea turtle         | tttctcccctgaagtggctcccgccttagcagccgcatgg   |
| Painted turtle           | tttctcccctgaagtggctcccgccttagcagccgcatgg   |
| Chinese softshell turtle | tttctcccctgaagtggctcccgccttagcagccgcatgg   |
| Lizard                   | gattcccgctgcccgcctcccgccttagcagccgcatgg    |
| Coelacanth               | tatttttctggaagtggctcccgccttagcagccgcatgg   |
| Tetraodon                | tttcttctctaaaaattggctcccgccttagcagccgcatgg |
| Fugu                     | tttcttctctaaaaattggctcccgccttagcagccgcatgg |
| Yellowbelly pufferfish   | tttcttctctaaaaattggctcccgccttagcagccgcatgg |
| Nile tilapia             | tttcttctctaaaaattggctcccgccttagcagccgcatgg |
| Zebra mbuna              | tttcttctctaaaaattggctcccgccttagcagccgcatgg |
| Medaka                   | cttcttctctaaaaattggctcccgccttagcagccgcatgg |
| Southern platyfish       | cttcttctctaaaaattggctcccgccttagcagccgcatgg |
| Stickleback              | tttcttctctaaaaattggctcccgccttagcagccgcatgg |
| Atlantic cod             | cttcttctctaaaaattggctcccgccttagcagccgcatgg |
| Zebrafish                | attcttctctaaaaattggctcccgccttagcagccgcatgg |
| Mexican tetra (cavefish) | tttcttctctaaaaattggctcccgccttagcagccgcatgg |
| Lamprey                  | ttcttttgctg---cgctgcccgccttagcagccgcatgg   |

**B 3' UTR sequence; 13:36048652 – 36048681 (forward sequence)**

|                          |                                                                     |
|--------------------------|---------------------------------------------------------------------|
| Human                    | ct-----gga----ta-cttcc-a-----gacatttt-----cc--ac-taa--c-a           |
| Individual 3             | ct-----gga----ta-cttcc-a-----gacatttt-----cc--ac-taa--c-a           |
| Chimp                    | ct-----gga----ta-cttcc-a-----gacatttt-----cc--ac-taa--c-a           |
| Gorilla                  | ct-----gga----ta-cttcc-a-----gacatttt-----cc--ac-taa--c-a           |
| Orangutan                | ct-----gga----ta-cttcc-a-----gacatttt-----cc--ac-taa--c-a           |
| Gibbon                   | ct-----gga----ta-cttcc-a-----gacatttt-----cc--ac-taa--c-a           |
| Baboon                   | ct-----cga----ta-cttcc-a-----gacatttt-----cc--ac-taa--c-a           |
| Green monkey             | ct-----cga----ta-cttcc-a-----gacatttt-----cc--ac-taa--c-a           |
| Marmoset                 | ct-----gga----ta-cttcc-a-----gacatttt-----cc--ac-taa--c-a           |
| Squirrel monkey          | ct-----gga----ta-cttcc-a-----gacatttt-----cc--ac-taa--c-a           |
| Chinese tree shrew       | tt-----gga----ta-cttcc-a-----gacatttt-----tc--ac-taa--c-a           |
| Squirrel                 | tt-----gga----ta-cttcc-a-----gacatttt-----cc--ac-taa--c-a           |
| Lesser Egyptian jerboa   | ct-----ggg----tt-cttcc-a-----gacatttt-----tc--ac-taa--c-a           |
| Prairie vole             | t-----gga----aa-tttcc-a-----gacatttt-----cc--ac-gaa--c-a            |
| Chinese hamster          | t-----gga----aa-cttcc-a-----gacatttt-----cc--ac-gag--c-a            |
| Golden hamster           | t-----gga----aa-cttcc-a-----gacatttt-----cc--ac-gaa--c-a            |
| Mouse                    | tt-----gga----aa-ctttc-a-----gacattttc-----cc--acagaa--c-a          |
| Rat                      | tt-----ggg----ga-cttcc-a-----gacatttt-----cc--acagaa--c-a           |
| Naked mole-rat           | tt-----gga----ta-cttcc-a-----gacatttt-----cc--ac-taa--c-a           |
| Guinea pig               | tt-----gga----ta-cttcc-a-----gacatttt-----cc--ac-taa--c-a           |
| Chinchilla               | tt-----gga----ta-cttcc-a-----gacatttt-----cc--ac-taa--c-a           |
| Brush-tailed rat         | tt-----gga----ga-cttcc-a-----gacatttt-----cc--ac-taa--c-a           |
| Rabbit                   | tt-----gga----ta-cttcc-a-----gacatttt-----cc--ac-taa--c-a           |
| Pika                     | ttt-----gga----ta-cttcc-a-----gacatttt-----cc--ac-caa--c-a          |
| Pig                      | tt-----gga----ta-cttcc-a-----ggcatttt-----cc--ac-taa--c-g           |
| Alpaca                   | tt-----gga----ta-cttcc-a-----gacatttt-----cc--ac-taa--c-a           |
| Bactrian camel           | tt-----gga----ta-cttcc-a-----gacatttt-----cc--ac-taa--c-a           |
| Dolphin                  | tt-----gga----ta-cttcc-a-----gacatttt-----cc--ac-taa--c-a           |
| Killer whale             | tt-----gga----ta-cttcc-a-----gacatttt-----cc--ac-taa--c-a           |
| Tibetan antelope         | tt-----gga----ta-cttcc-a-----gacatttt-----cc--ac-taa--c-a           |
| Cow                      | tt-----gga----tg--ttcc-a-----gacatttt-----cc--ac-taa--c-a           |
| Sheep                    | tt-----gga----ta-cttcc-a-----gacatttt-----cc--ac-taa--c-a           |
| Domestic goat            | tt-----gga----ta-cttcc-a-----gacatttt-----cc--ac-taa--c-a           |
| Horse                    | tt-----gga----ta-cttcc-a-----gacatttt-----cc--ac-taa--c-a           |
| White rhinoceros         | tc-----gga----caacttcc-a-----gacatttt-----cc--ac-caa--c-a           |
| Cat                      | tt-----gga----ta-cttcc-a-----gacatttt-----cc--gc-taa--c-a           |
| Ferret                   | tt-----gga----ga-ctgcc-a-----gacatttt-----cc--ac-taa--c-a           |
| Panda                    | tt-----gga----ga-cttcc-a-----gacatttt-----cc--ac-taa--c-a           |
| Pacific walrus           | tt-----gga----ga-cttcc-a-----gacagttt-----cc--ac-taa--c-a           |
| Weddell seal             | tt-----gga----ga-cttcc-a-----gacatttt-----cc--ac-taa--c-a           |
| Megabat                  | tt-----gga----ta-cttcc-a-----gacatttt-----cc--ac-taa--c-g           |
| Microbat                 | tt-----gga----ta-cttcc-a-----gacatttt-----cc--tc-taa--c-a           |
| Big brown bat            | tt-----gga----ta-cttcc-a-----gacatttt-----cc--tc-tat--c-a           |
| Hedgehog                 | tttttttaaaaaaaaaa-----ta-cttcc-a-----gctatttt-----cc--ac-taa--c-a   |
| Shrew                    | tt-----gga----ta-cttcc-a-----gacatttt-----cc--ac-taa--c-a           |
| Star-nosed mole          | tt-----gga----ta-cttcc-a-----gacatttt-----cc--ac-aaa--c-a           |
| Cape elephant shrew      | cc-----gga----gg-cccc-a-----gacattttc-----tc--ac-tta--c-a           |
| Manatee                  | tg-----gga----ga-ctggc-g-----gacatttt-----cc--ac-taa--c-a           |
| Cape golden mole         | tt-----ggg----ga-cttcc-a-----gccagttt-----cc--aa-aaa--c-a           |
| Aardvark                 | tt-----ggg----ga-actcc-a-----gacatttcc-----ccccgc-gaa--c-a          |
| Armadillo                | tt-----gaa----ta-cttcc-c-----gacatttt-----cc--tc-taa--c-a           |
| Opossum                  | ttt-----gga----ta-cttca-g-----gacatttct-----ct--gc-taa--t-g         |
| Tasmanian devil          | ttt-----gga----ta-cttca-g-----gacatttct-----ct--gc-taa--t-g         |
| Wallaby                  | ttg-----gga----ta-cttca-g-----gacatttt-----ct--gc-taa--t-g          |
| Platypus                 | tt-----gga----ga-cttcc-g-----gacatttt-----ct--gc-tca--a-g           |
| Saker falcon             | tt-----gga----ta-cttcaag-----gacagttt-----ct--gc-taaaga-g           |
| Peregrine falcon         | tt-----gga----ta-cttcaag-----gacagttt-----ct--gc-taaaga-g           |
| Collared flycatcher      | tt-----gga----ta-cttcaag-----gacatttt-----ct--gc-taaaaa-g           |
| White-throated sparrow   | tt-----gga----ta-cttcaag-----gacatttt-----ct--gc-taaaaa-g           |
| Medium ground finch      | tt-----gga----ta-cttcaag-----gacattttt-----ct--gc-taaaaa-g          |
| Zebra finch              | tt-----gga----ta-cttcaag-----gacatttt-----ct--gc-taaaaa-g           |
| Tibetan ground jay       | tt-----gga----ta-cttcaag-----aacatttt-----ct--gc-taaaaa-g           |
| Budgerigar               | tt-----gga----ta-cttcaag-----gacatttt-----ct--gc-taaaga-g           |
| Parrot                   | tt-----gga----ta-cttcaag-----gacattgt-----ct--gc-taaaga-g           |
| Rock pigeon              | tt-----gga----ta-cttcaag-----gacaattt-----ct--gc-taaaga-g           |
| Mallard duck             | tt-----gga----ta-cttcaag-----gacatttt-----ct--gc-taaaga-g           |
| Chicken                  | tt-----gga----ta-cttcaag-----gacatttt-----ct--gc-taacga-g           |
| Turkey                   | tt-----gga----ta-cttcaag-----gacatttt-----ct--gc-taacga-g           |
| American alligator       | tt-----gga----ta-cttca-g-----gacatttt-----ct--gc-taa--a-g           |
| Green sea turtle         | tc-----gga----ta-cttca-g-----gacatttt-----ct--gc-taa--a-g           |
| Painted turtle           | tc-----gga----ta-cttca-g-----gacatttt-----ct--gc-taa--a-g           |
| Chinese softshell turtle | tc-----gga----ta-cttca-g-----gacatttt-----ct--gc-taa--a-g           |
| Lizard                   | tt-----gga----tg-cttct-g-----gacatttt-----cc--ac-tga--a-g           |
| Coelacanth               | ct-----gga----ta-cttga-g-----gacattttttt-----ct--gc-taa--g-g        |
| Tetraodon                | tt-----tgc--tcatc-ttttt-g-----aaagtttacat-----t-ct--ga-tag--gcg     |
| Nile tilapia             | tt-----ttt--tc--tt-tatct-g-----aactttct-----ctttat--ct--ga-tag--a-a |
| Medaka                   | tt-----aaaaatc-ca-cgtcg-g-----aactttttt-----ctttat--ct--ga-tag--a-a |
| Southern platyfish       | tt-----aaa-----tct-g-----aactttttt-----ctttat--ct--ga-tag--a-a      |
| Stickleback              | tt-----aca--tt--tt-gatag-gcgtacaacatttg-----ccacat-----tga--a-a     |
| Atlantic cod             | tt-----ggaaatc--tc-atcct-c-----ggcctctc-----tttctt-gt--ga-tat--a-a  |
| Zebrafish                | tt-----taa--ca--tt-cgcct-g-----gattattt-----ctgaagaga--ga-aag--a-a  |
| Spotted gar              | tt-----atg--aa--ta-acttc-a-----ggattttt-----ct--gc-tag--aaa         |

**Supp. Figure 2. Multi-species sequence comparisons of *MAB21L1* non-coding regions.**

Nucleotide alignments for 5'UTR (**A**) and 3'UTR (**B**) are shown using data generated by UCSC Multiz Alignments of 100 Vertebrates. Identical nucleotides are shaded in grey; positions of variant nucleotides are indicated in bold; non-coding variants in Individuals 2 (**A**) and 3 (**B**) are shown in red.

### Supp. Figure 3. Alignment of full-length MAB21L1 and related proteins.

|                           |                                                               |                        |     |
|---------------------------|---------------------------------------------------------------|------------------------|-----|
| MAB21L1                   | MIAAQAKLVYHLNKYYNEKCOARKAAIAKTIREVCKVVS                       | DVLKEVEVOEPRRFISSLNE-M | 59  |
| MAB21L2                   | MIAAQAKLVYQLNKYYTERCOARKAAIAKTIREVCKVVS                       | DVLKEVEVOEPRRFISSLSE-I |     |
| mMab2111                  | MIAAQAKLVYHLNKYYNEKCOARKAAIAKTIREVCKVVS                       | DVLKEVEVOEPRRFISSLNE-M |     |
| cMab2111                  | MIAAQAKLVYHLNKYYNEKCOARKAAIAKTIREVCKVVS                       | DVLKEVEVOEPRRFISSLNE-M |     |
| mab2111                   | MIAAQAKLVYHLNKYYNEKCOARKAAIAKTIREVCKVVS                       | DVLKEVEVOEPRRFISSLNE-M |     |
| mab-21                    | MLGHNQNVVYQVNNYFNEKVQHRKVRVTKTVQRIAKVVQEILKEVEAQEPRRFINTLSETT |                        |     |
| <b>Individuals 1a, 1b</b> |                                                               | <b>L</b>               |     |
| MAB21L1                   | DNRRYEGLEVI-SPTFEFVVLYLNQMGVFNFDVDDGSLPGCAVLKLS               | DGRKRSM                | 118 |
| MAB21L2                   | DARRYEGLEVI-SPTFEFVVLYLNQMGVFNFDVDDGSLPGCAVLKLS               | DGRKRSM                |     |
| mMab2111                  | DNRRYEGLEVI-SPTFEFVVLYLNQMGVFNFDVDDGSLPGCAVLKLS               | DGRKRSM                |     |
| cMab2111                  | DNRRYEGLEVI-SPTFEFVVLYLNQMGVFNFDVDDGSLPGCAVLKLS               | DGRKRSM                |     |
| mab2111                   | DNRRFEGLEVI-SPTFEFVVLYLNQMGVFNFDVDDGSLPGCAVLKLS               | DGRKRSM                |     |
| mab-21                    | TGRFDGI-VVHSPSEYEAVLYLNQMGVFNFDVDDGTIQGCAVLKLS                | DGRKRSM                |     |
| <b>Individual 2</b>       | <b>C</b>                                                      |                        |     |
| MAB21L1                   | ASGYLSARKIRSRFOTLVAQAV-----DKCSYRDVVKMVADTSEVKLRIRDRYVVQITP   |                        | 172 |
| MAB21L2                   | ASGYLSARKIRSRFOTLVAQAV-----DKCSYRDVVKMIADTSEVKLRIRERYVVQITP   |                        |     |
| mMab2111                  | ASGYLSARKIRSRFOTLVAQAV-----DKCSYRDVVKMVADTSEVKLRIRDRYVVQITP   |                        |     |
| cMab2111                  | ASGYLSARKIRSRFOTLVAQAV-----DKCSYRDVVKMVADTSEVKLRIRDRYVVQITP   |                        |     |
| mab2111                   | ASGYLSARKIRSRFOTLVAQAV-----DKCSYRDVVKMVADTSEVKLRIRDRYVVQITP   |                        |     |
| mab-21                    | ASGYLSARKIRHRFQNIQAQVLQTPQFSDYC-----KLLQDNTDVRVRVDDKYTVQITC   |                        |     |
| MAB21L1                   | AFKCTGIWPRSAAHWPLPHIPWPGPNR-VA-EVKAEGFNLLSKECHSLA-----GKQSSA  |                        | 225 |
| MAB21L2                   | AFKCTGIWPRSAAQWPMPHIPWPGPNR-VA-EVKAEGFNLLSKECYSLT-----GKQSSA  |                        |     |
| mMab2111                  | AFKCTGIWPRSAAHWPLPHIPWPGPNR-VA-EVKAEGFNLLSKECHSLA-----GKQSSA  |                        |     |
| cMab2111                  | AFKCTGIWPRSAAHWPLPHIPWPGPNR-VA-EVKAEGFNLLSKECHSLA-----GKQSSA  |                        |     |
| mab2111                   | AFKCTGIWPRSAAHWPLPHIPWPGPNR-VA-EVKAEGFNLLSKECYSLN-----GKQSSA  |                        |     |
| mab-21                    | AFRCNGIWPRSAHWPIAAGLPWP--NAALANQTKAEGFDLTSRET-AITQQNNPNKQASS  | <b>R</b>               |     |
| <b>Individual 3</b>       |                                                               |                        |     |
| MAB21L1                   | -ESDAWVLOFAEAENRLOMGCCRKKCLSILKTLRDRHLELPGQPLNNYHMKTLLVSYECEK |                        | 284 |
| MAB21L2                   | -ESDAWVLOFGEAENRLLMGCCRKNKCLSVLKTLRDRHLELPGQPLNNYHMKTLLLYECEK |                        |     |
| mMab2111                  | -ESDAWVLOFAEAENRLOMGCCRKKCLSILKTLRDRHLELPGQPLNNYHMKTLLVSYECEK |                        |     |
| cMab2111                  | -ESDAWVLOFAEAENRLOMGCCRKKCLSILKTLRDRHLELPGQPLNNYHMKTLLVSYECEK |                        |     |
| mab2111                   | -ESDAWVLOFAEAENRLLGCCRKKCLSLLKTLRDRHLELPGQPLNNYHMKTLLVSYECEK  |                        |     |
| mab-21                    | MEADAWAMKMHGAENMLLTGG-RRKTLNILKCLRDAHMDFPGTPTVTNYILKTLVLYECEK |                        |     |
| MAB21L1                   | HPRESDWDESCLGDRLNGILLQLISCLQCRRCPHYFLPNLDFOGKP-HSALENAAKQTW   |                        | 343 |
| MAB21L2                   | HPRETDWDESCLGDRLNGILLQLISCLQCRRCPHYFLPNLDFOGKP-HSALESAAKQTW   |                        |     |
| mMab2111                  | HPRESDWDESCLGDRLNGILLQLISCLQCRRCPHYFLPNLDFOGKP-HSALENAAKQTW   |                        |     |
| cMab2111                  | HPRESDWDESCLGDRLNGILLQLISCLQCRRCPHYFLPNLDFOGKP-HSALENAAKQTW   |                        |     |
| mab2111                   | HPRESDWDENCLGDRLNGILLQLISCLQCRRCPHYFLPNLDFOGKP-HSALENAAKQTW   |                        |     |
| mab-21                    | HCSEYEWEDPNIGDRLVGIILLQLVSLQCRRCAPHYFLPSLDLLRSKPVHS-IEHSAQLAW |                        |     |
| MAB21L1                   | RLAREILTNPKSLEKL                                              | 359                    |     |
| MAB21L2                   | RLAREILTNPKSLEKL                                              |                        |     |
| mMab2111                  | RLAREILTNPKSLEKL                                              |                        |     |
| cMab2111                  | RLAREILTNPKSLEKL                                              |                        |     |
| mab2111                   | RLAREILTNPKSLEKL                                              |                        |     |
| mab-21                    | HLVRKLMIDPNALQSL                                              |                        |     |



**Supp. Figure 3. Alignment of full-length MAB21L1 and related proteins.** Identical amino acids are shaded in grey; positions of variant amino acids are indicated in bold and variants identified in Individuals 1a, 1b, 2 and 3 are shown in red. Note high conservation between different vertebrate MAB21L1/Mab21l1/mab21l1 proteins as well as with its close human homolog MAB21L2 and *C. elegans* mab-21. Human MAB21L1 (NP\_005575.1), human MAB21L2 (NP\_006430.1), mouse Mab21l1 (NP\_034880.1), chicken Mab21l1 (NP\_989864.1), zebrafish mab21l1 (NP\_694506.2) and *C. elegans* mab-21 (NP\_497940.2).
